# Supplementary material
Source: Springer Nature journal article supplement (https://www.springermedizin.de/resource/supplementary/12936_2014_3664_MOESM1_ESM.pdf/9546136)

**a****Oocyst positive (%)**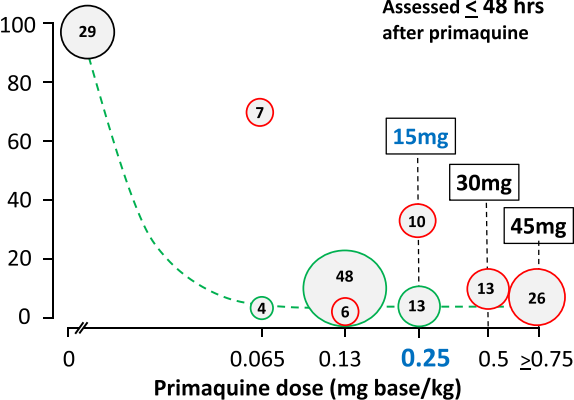**b****Sporozoite positive (%)**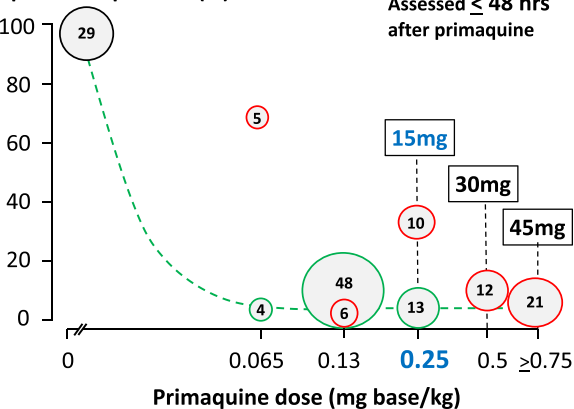

Supplement: MOESM1 [file 9546136]
